# Supplementary material for: Changes in Health Status in the Ft. Devens Gulf War Veterans Cohort: 1997-2017
Source: PubMed Central journal article supplement — Neurosci Insights. 2020 Aug 20;15:2633105520952675. doi: 10.1177/2633105520952675 (PMC7444112; doi:10.1177/2633105520952675), 2020-08-20
Supplement: sj-pdf-1-exn-10.1177_2633105520952675.pdf [file sj-pdf-1-exn-10.1177_2633105520952675.pdf]

| <b>Demographics/Characteristics of Non-responders and Responders to the 2013-2017 survey</b> |                                                                                          |                                                                                     |
|----------------------------------------------------------------------------------------------|------------------------------------------------------------------------------------------|-------------------------------------------------------------------------------------|
| <b>Demographic/Characteristic</b>                                                            | <b>Non-responders (n=974):</b><br>Responded to 1997-1998 Survey but not 2013-2017 Survey | <b>Responders (n=317):</b><br>Responded to both the 1997-1998 and 2013-2017 Surveys |
| Age at Baseline Survey, years                                                                | 31.91 + 9.12                                                                             | 32.27 + 8.44                                                                        |
| Age at 1997-1998 Survey, years                                                               | 37.82 + 9.14                                                                             | 37.94 + 8.37                                                                        |
| Male, n (%)                                                                                  | 881 (90.5)                                                                               | 279 (88.0)                                                                          |
| Caucasian, n (%)*                                                                            | 853 (87.6)                                                                               | 294 (92.7)                                                                          |
| Activity Duty, n (%) (versus Reserve, National Guard)*                                       | 239 (24.5)                                                                               | 59 (18.6)                                                                           |
| Mississippi PTSD scale-score                                                                 | 61.53 + 13.00                                                                            | 62.06 + 14.36                                                                       |
| Clinical cutoff on Mississippi scale-score (>89), n (%)                                      | 43 (4.4)                                                                                 | 19 (6.0)                                                                            |
| Met Criteria for CMI at 1997-1998 survey, n (%)                                              | 564 (57.9)                                                                               | 185 (58.4)                                                                          |
| Number of Symptoms Endorsed at 1997-1998 survey, mean + SD                                   | 13.97 + 11.61                                                                            | 14.19 + 11.40                                                                       |

\* p < 0.05
